# Supplementary material for: Geographic context affects the landscape change and fragmentation caused by wind energy facilities
Source: PubMed Central journal article supplement (PMC6640624; doi:10.7717/peerj.7129), 2019-07-16

**Supplemental materials: Maps of 5 wind facilities pre and post construction**

**Figure 1. Goodnoe Wind Facility**

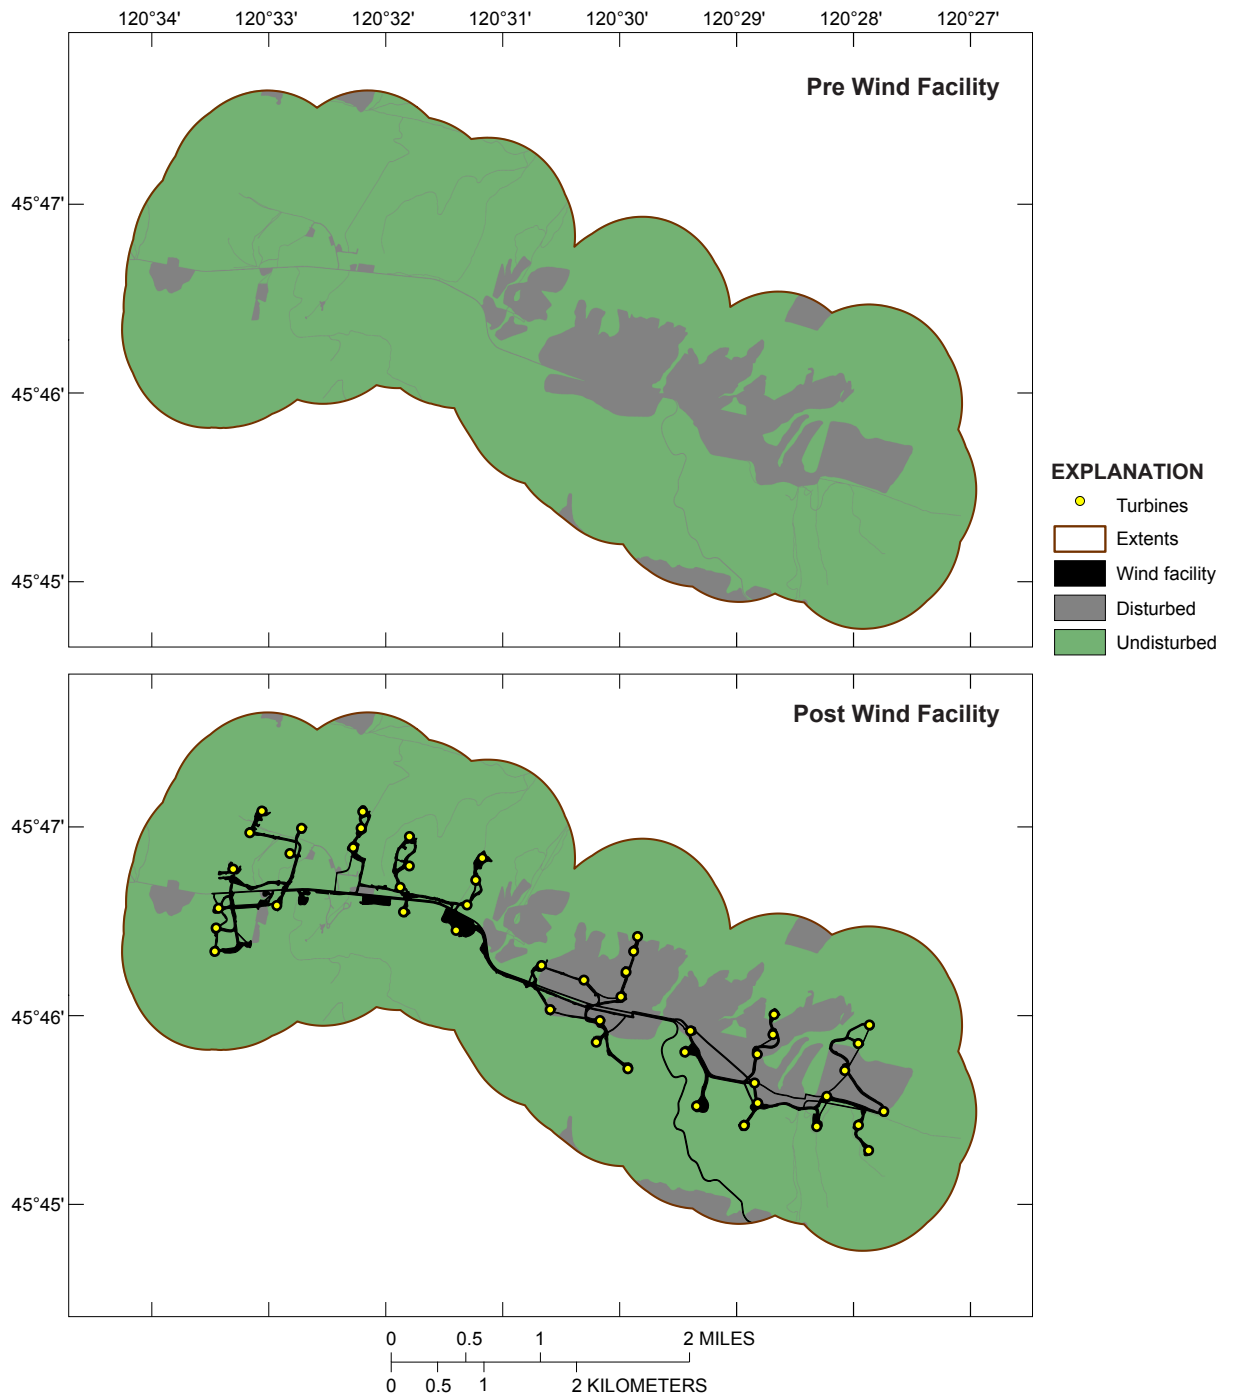

**Figure 2. Cerro Gordo Wind Facility**

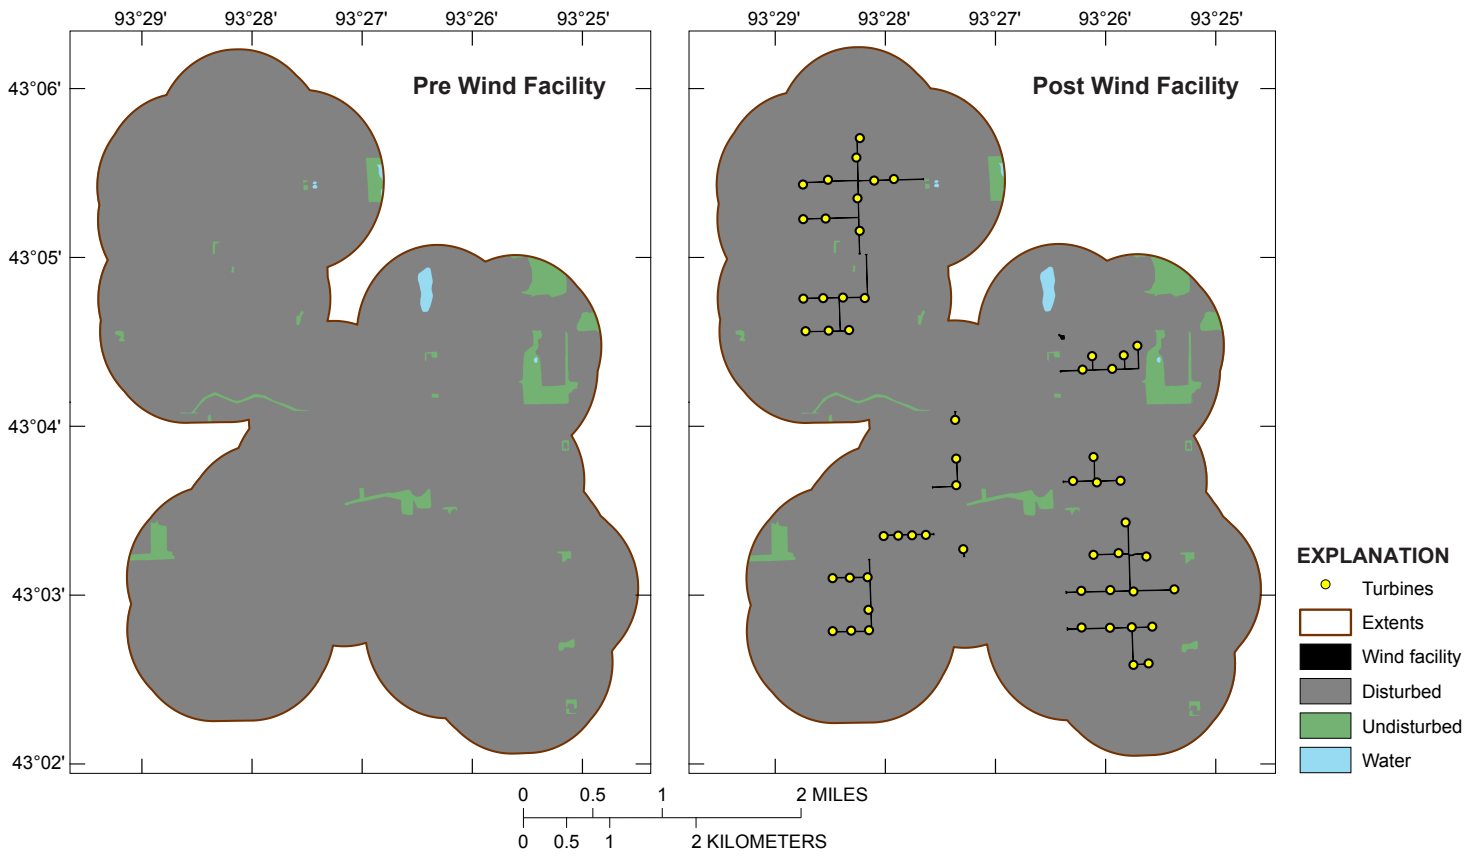

**Figure 3. Foote Creek Wind Facility**

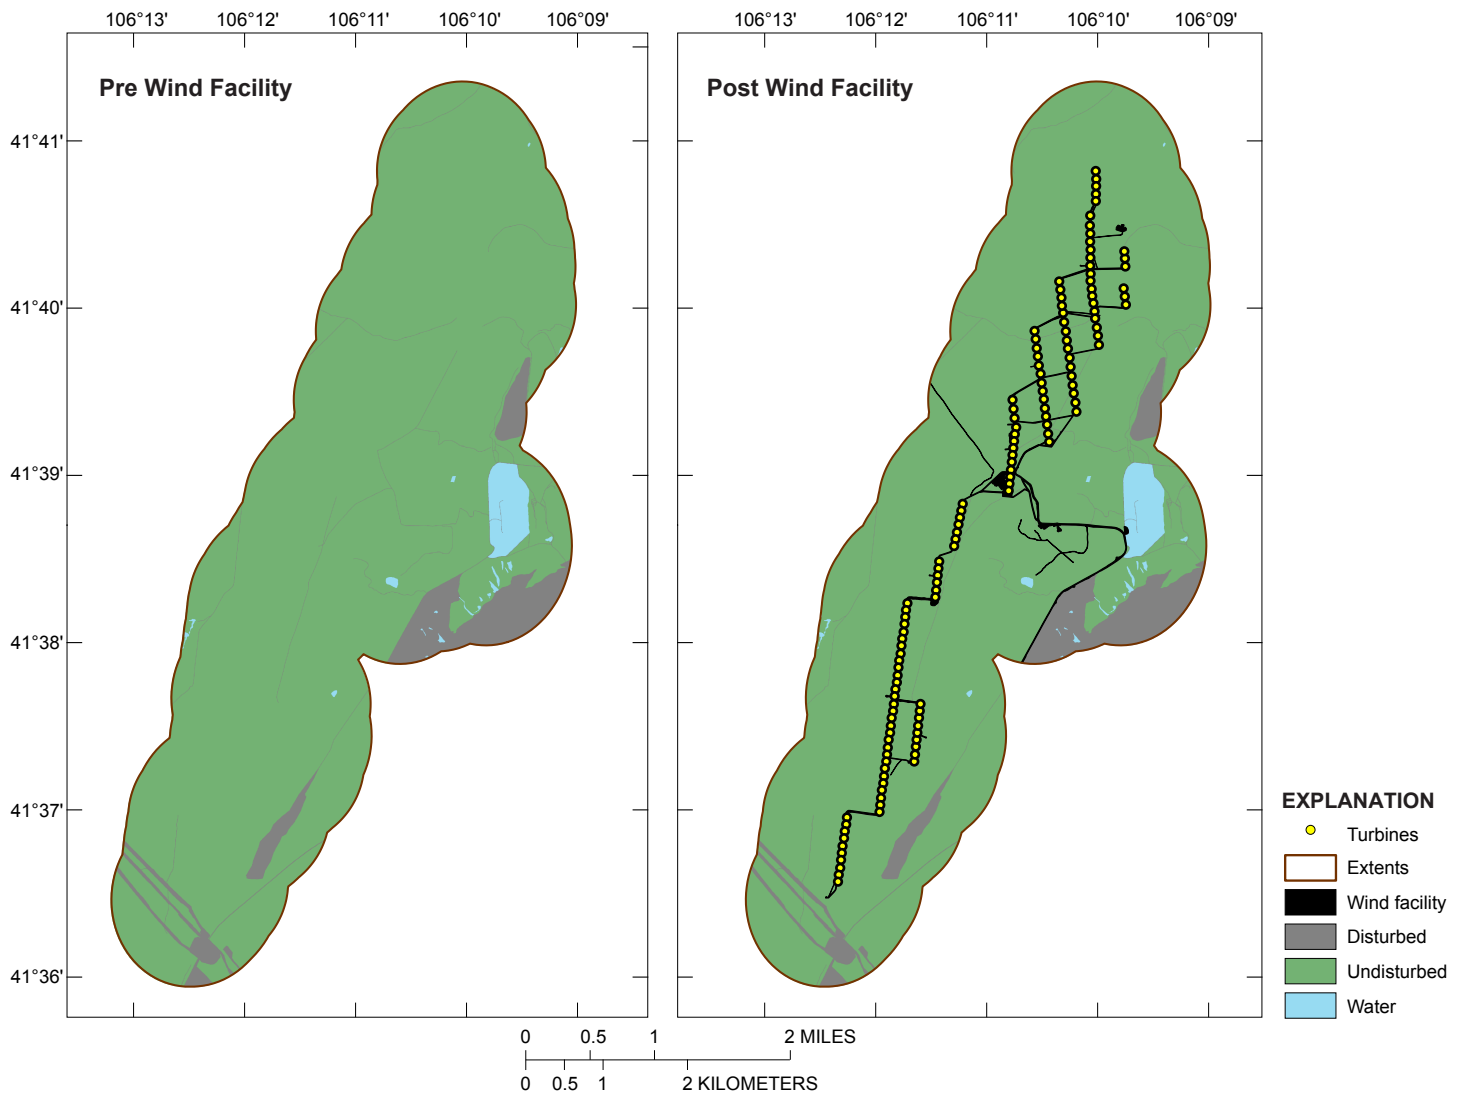

**Figure 4. White Creek Wind Facility**

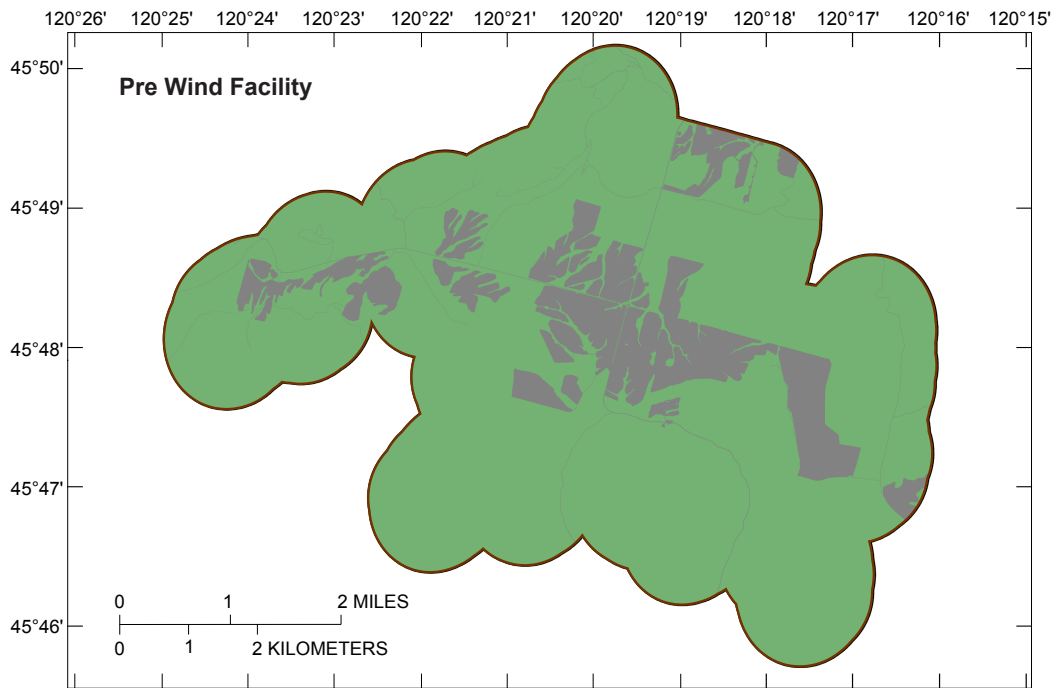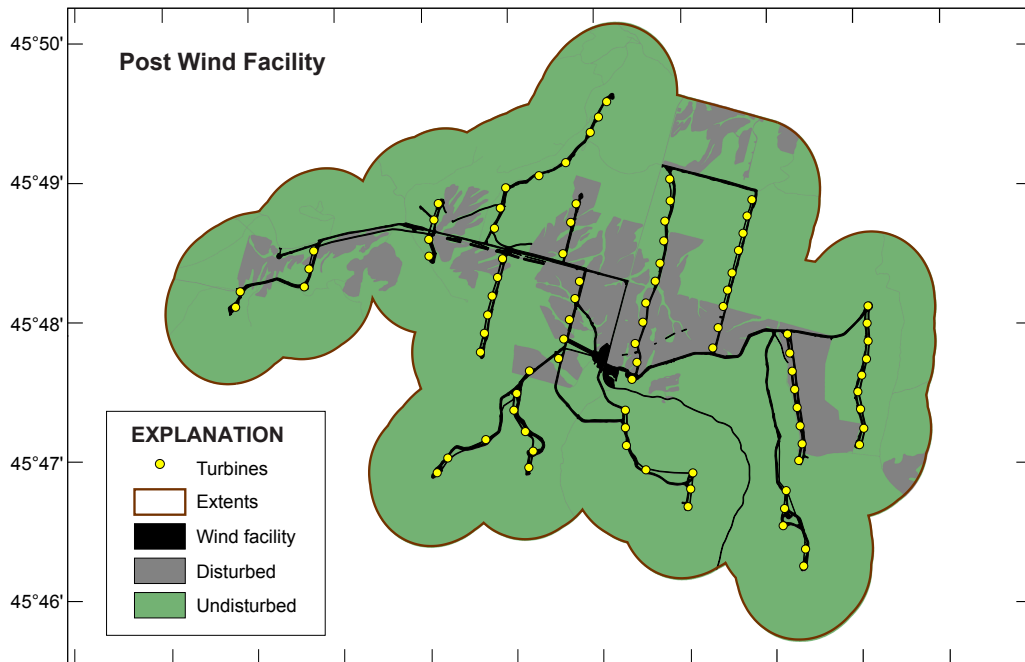

**Figure 5. Oliver Wind Facility**

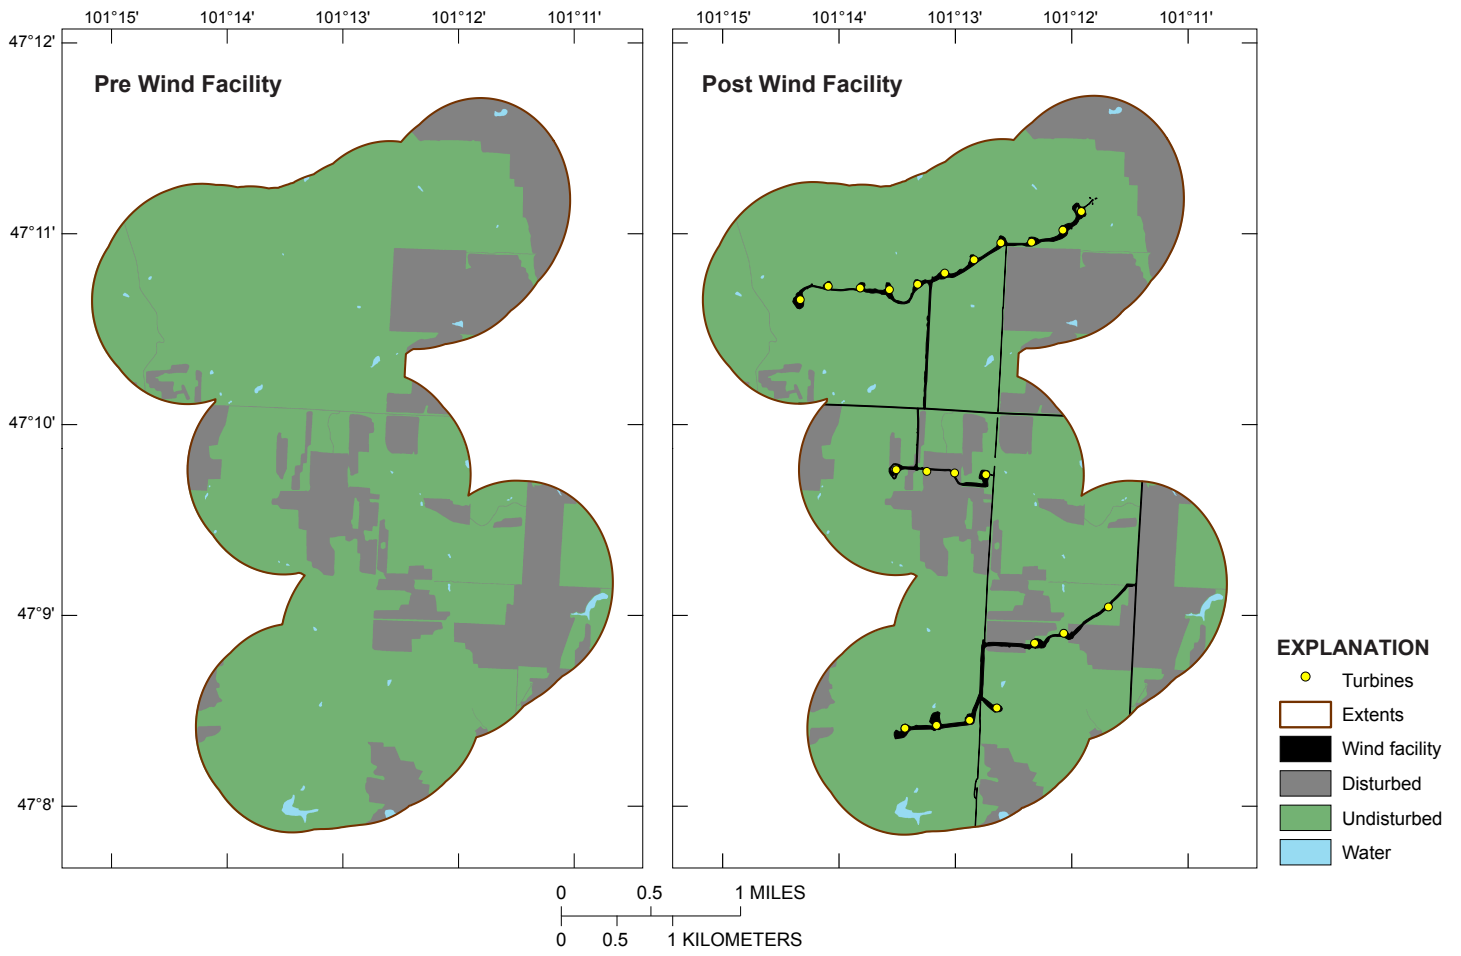

Supplement: peerj-07-7129-s001.pdf [file peerj-07-7129-s001.pdf]
